# Supplementary material for: Evolutionary Rate Covariation Identifies New Members of a Protein Network Required for Drosophila melanogaster Female Post-Mating Responses
Source: PubMed Central journal article supplement (PMC3894160; doi:10.1371/journal.pgen.1004108), 2014-01-16
Supplement: pgen.1004108.s001.pdf [file pgen.1004108.s001.pdf]

## A: proteome-wide ERC calculations

### known SP network proteins

|          |         |
|----------|---------|
| SP       | CG9997  |
| SPR      | CG17575 |
| CG1652   | CG1656  |
| seminase |         |

mean corr: 0.3115  $p = 0.000154$

### whole proteome

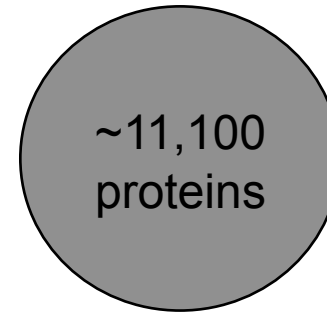

mean corr: 0.0019

### 664 reprod. proteins\*

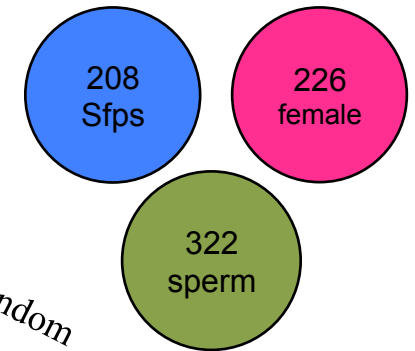

compare to random sets of 664  
 $p < 0.0001$   
mean corr: 0.0326

## B: ERC calculations after controlling for reproductive protein evolution

|          |         |
|----------|---------|
| SP       | CG9997  |
| SPR      | CG17575 |
| CG1652   | CG1656  |
| seminase |         |

mean corr: 0.2806

compare to random sets of 7  
 $p = 0.001002$

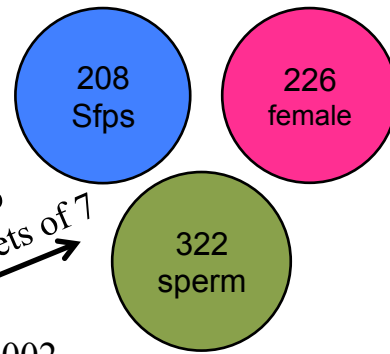

mean corr: 0.0047

## C: identify new candidates by screening against Sfps and female sets

|         |
|---------|
| SP      |
| CG17575 |
| CG1652  |
| CG1656  |
| CG9997  |

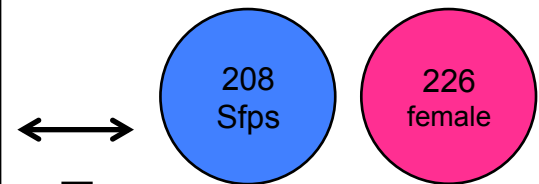

434 proteins screened

*aqrs*  
*antr*  
*intr*  
*frma*  
*hdly*

11 with no effect

*Esp*

1 with no effect

\*Numbers in the colored circles sum to 756 proteins, but only 664 had adequate numbers of orthologs to be included in the analysis.
