# Supplementary material for: Evolutionary Rate Covariation Identifies New Members of a Protein Network Required for Drosophila melanogaster Female Post-Mating Responses
Source: PubMed Central journal article supplement (PMC3894160; doi:10.1371/journal.pgen.1004108), 2014-01-16

### SPR

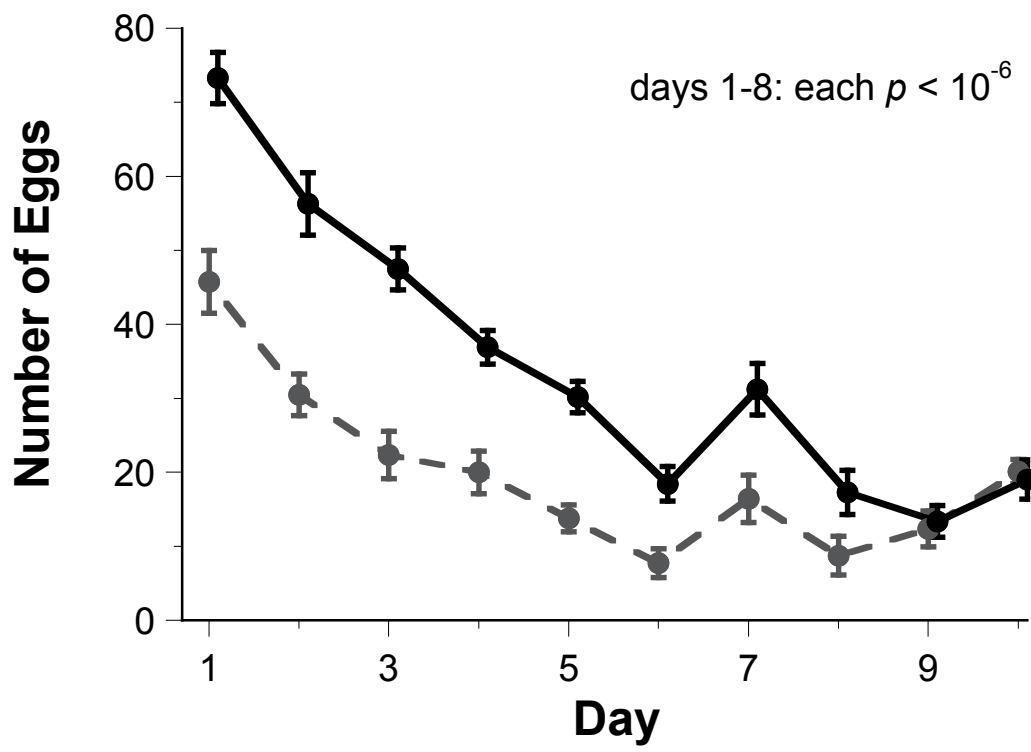

Supplement: pgen.1004108.s002.pdf [file pgen.1004108.s002.pdf]
