# Supplementary material for: Evolutionary Rate Covariation Identifies New Members of a Protein Network Required for Drosophila melanogaster Female Post-Mating Responses
Source: PubMed Central journal article supplement (PMC3894160; doi:10.1371/journal.pgen.1004108), 2014-01-16
Supplement: pgen.1004108.s003.pdf [file pgen.1004108.s003.pdf]

**aquarius (CG14061)**

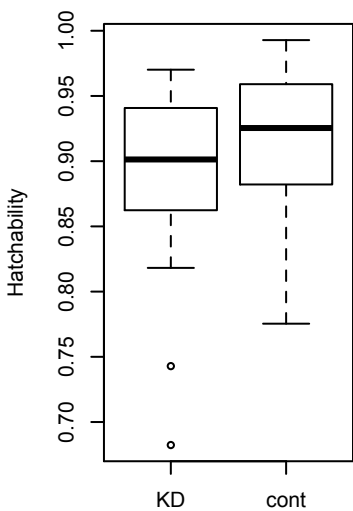

Genotype  
 $p = 0.09$

**antares (CG30488)**

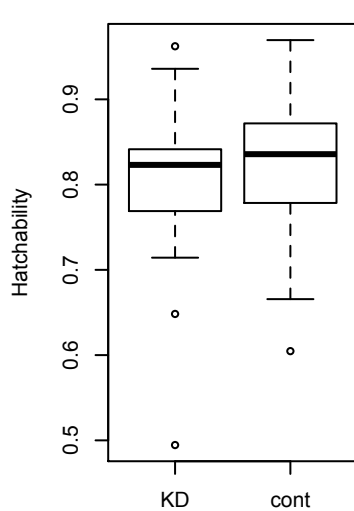

Genotype  
 $p = 0.02$

**intrepid (CG12558)**

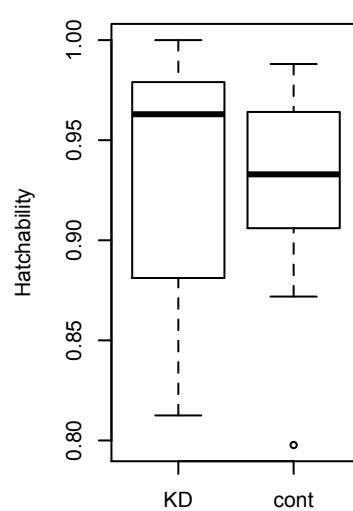

Genotype  
 $p = 0.65$

**fra mauro (CG3239)**

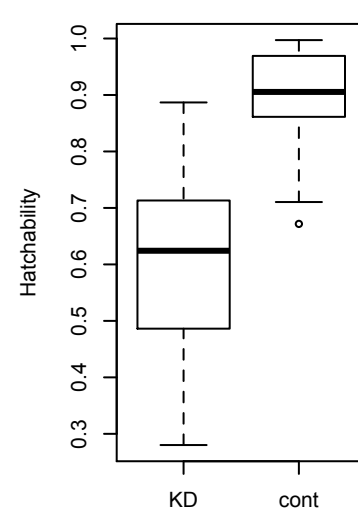

Genotype  
 $p < 2e-16$

**hadley (CG5630)**

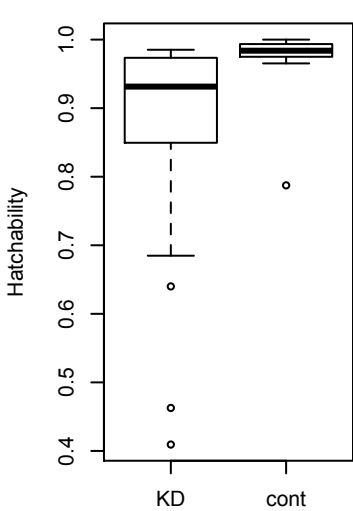

Genotype  
 $p < 2e-16$

**Esp**

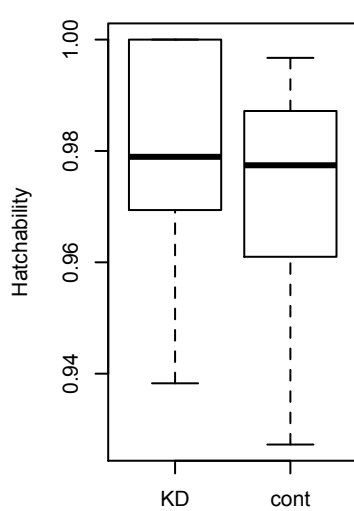

Genotype  
 $p = 0.05$

**SPR**

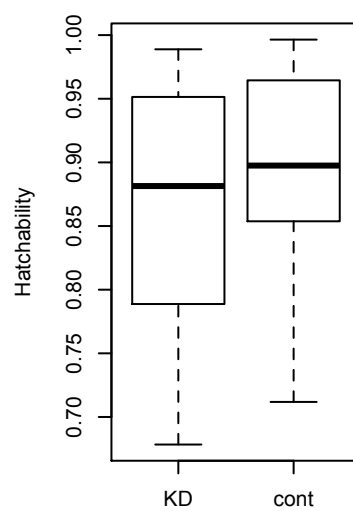

Genotype  
 $p = 3.3e-5$
