# Supplementary material for: Evolutionary Rate Covariation Identifies New Members of a Protein Network Required for Drosophila melanogaster Female Post-Mating Responses
Source: PubMed Central journal article supplement (PMC3894160; doi:10.1371/journal.pgen.1004108), 2014-01-16

*fra mauro (CG3239)*

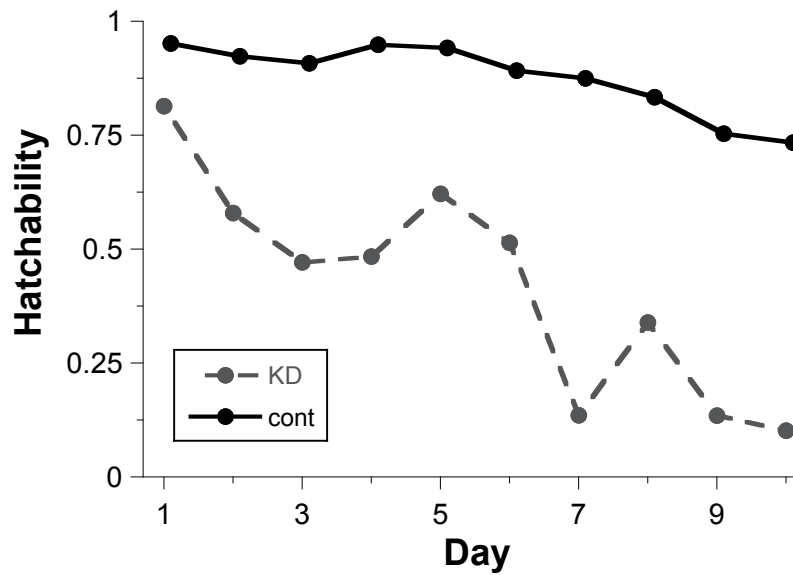

*hadley (CG5630)*

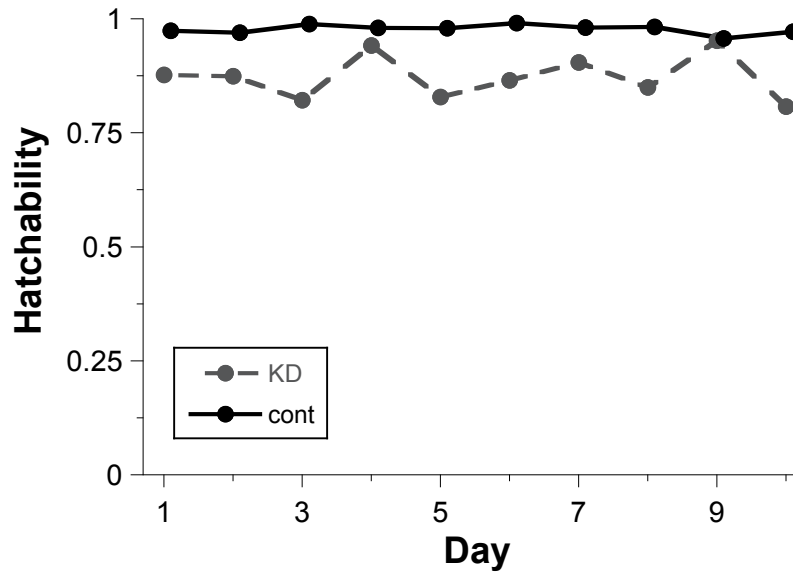

*SPR*

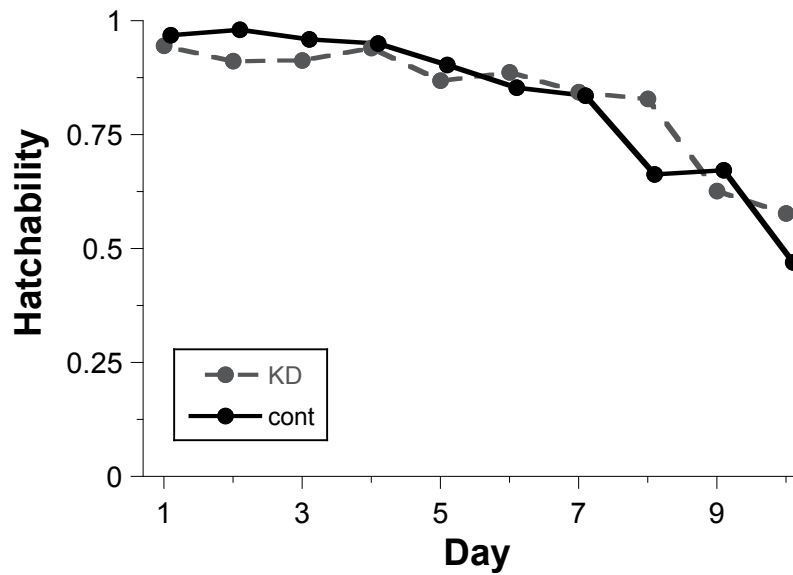

Supplement: pgen.1004108.s004.pdf [file pgen.1004108.s004.pdf]
