# Supplementary material for: Evolutionary Rate Covariation Identifies New Members of a Protein Network Required for Drosophila melanogaster Female Post-Mating Responses
Source: PubMed Central journal article supplement (PMC3894160; doi:10.1371/journal.pgen.1004108), 2014-01-16
Supplement: pgen.1004108.s005.pdf [file pgen.1004108.s005.pdf]

```

dme1 -----MHFKL RL-----LEL ---IV--GLL WQVKSHQP- -----ADPCQNF
dsec -----MHLKL RL-----LEL ---FV--GFL LVQVKSRRPQ- -----ANPCQNF
dsim -----MHLKL RL-----LEL ---IV--GLL LVQVKSRRPQ- -----ANPCQNF
dyak -----MHCKR RL-----WL ---IV--GLL LVQVKSHQP- -----ADPCQNF
dere -----MHFKR RL-----WL ---IA--GLL LGQVKSHQP- -----ADPCQNF
dana -----MSFDL RL-----LLI ---ILLPGWA RPQSQPQPQP QLPDHVTRHM NRNVDPCKDF
dper -----MRVDV QL-----LLM TTAIL--SFP SPCLCRAAQ- -LPSSMRRHM NRLADPCKDF
dpse -----MRVDV QL-----LLM TTAIL--SFP SPCLCRAAQ- -LPSSLRRHM NRLADPCKDF
dwi1 -----SSKLL SL-----LEL PKSIS----- --LHIDPK- -----IDPCEDF
dgri -----M-CKL QL-----LLL ---M--RLV LAILASDGW- --PGYLQLHM NASADPCLDF
dnoj MFNVRELCKL QLWLPLGLSL ---CLSQCLW RPILASHAR- -LPVYIQRHM NASADACVDF
dvi1 -----MCKL QS-----LLL ---SI--FVS IIVSNASQR- -LPGYLVRHM NASADACVDF

```

```

YKVACGNWSA SHATDSYESF MDRLDYNYQE KLADLLDN-- -EREDDEPHF LQQLRNFYTA
YKVACGNWSS SHATDSYQSF MDQLDYNQYE KLADLLDN-- -EREDDEPHF VQQLRAFYTA
YKVACGNWSS SHETDSYQSF MDQLDYNQYE KLADLLDN-- -EREDDEPHF VQQLRAFYTA
YGVACGNWSS IHASDSYQSV LGQLDYNQYA KLADLLDT-- -DRGEDEPHS VQQLRYFYTA
YEYACGNWSS TEAT----SL LGQLDYNQYE KLADLLDT-- -EEKDDEPRF LQQLRYFYAA
YKHACGNWAS AHAGMGYRSA VGQLDFNYHE QLADLLEQ-P LTADQDEPRF VGLVRDYAA
YEYACGNWMM THQGRPYRSL LEQLDHVYHG KLAKLLDQ-P PPAAKEPRF VRMLRDYTA
YEYACGNWMM THQGRPYRSL LEQLDHVYHG KLAKLLDQ-P PPPAAKEPRF VRMLRDYTA
YNFACGNWAN VYRDRSYRSQ VDKLDYVFNRLADLLEEEE EYNGKQNPYF VQLLKTNYNS
YEHACGNWEE AHVTDAYSSQ LEQLDHVYHE QLASLLEQIT GAPSDGQPRF VELLRSSYAA
YEHACGNWSL AHADDVYASQ LEQLDYEYHA SLAELLEQ-- -QPGQPEPRF VQLLRDSYVA
YEHACGNWSQ AHAADAYNSQ LEQLDYMHE RLALLLDQ-- -PPSPGQPRF VQLLRDSYAA

```

```

CRKPLSQ-DQ VLRILEHLIV MENIQNEELS ----- -VGLTAA FRLQVLIDLN
CRKPLSQ-DQ VLRILEHLIA MDNIQTEQLT ----- -VGLTAA FRLKVLPDIN
CRKPLSQ-DQ VLRILEHLIA MDNIQTEQLT ----- -VGLTAA FRLKVLPDIN
CRRPLSQ-DQ VLRISLEQLIA LEHIQFEEMT ----- -VGLTAA FRLEVTIANIN
CRRPLTQ-DQ VLRITLQLIV LADIQFEELT ----- -VGLTAA FRLEVLADIN
CRANHTV-VQ AMEVLARIIR KPSTSLEDLT ----- -VGLNTA FRWNILLDLH
CRTPLEA-TP SAEFVLKLCG MAEVDGNELA ----- -VALTAL FQTDVLEITA
CRTPLEA-TP SAEFVLKLCG MAEVDGNELA ----- -VALTAL FQTDVLEIT
CRKLSRKTYK PDKFVQFLIN WSGKNFLNEP -----N WERLHSVLMN FGLGQVLGKH
CRDQAG-YD AAQFVRWLRD LSGISMTSED ND-----N WSQVSLKKG YGVAALQQFE
CRRLDKR-YD AAQFVRWLAE WSRGETESET ESASASERGN GSALIHLLKT YGLGELLQYE
CRALNER-YD VGRFVRWLRE FSHVDMETKE N-----D WRPLLRLIK N YGLPTMWOYE

```

```

DSNT----- ---YDIW-K QLMShRKHMD P-----NT TN--REPLTR EMFDKLWASL
DSNT----- ---YDIW-K QLLSNGEHMD T-----HT TN--REPLTR EIFDKLWAM
DSNT----- ---YDIW-K QLLSNREHMD T-----HT TN--REPLTR EIFDKLWAM
HYNK----- ---YEIW-K LLLARQEHMD P-----NT TN--RESLTR DQFDELWVRM
SDNK----- ---HEIW-K QLLSRRKDM T-----NT TN--REPLTR DKFDELWASL
GSEM----- ---TELWVT LILRHIEDMD E-----RE TR--RDAMTR GEFDRLEWHF
DSNL----- ---AAVWAQ LILRPSAEGD R-----NA SL--HQPLSR EQFDQLWRRL
DSNL----- ---ATVWAQ LILRPSAEGD R-----NA SL--HQPLSR EQFDQLWRRL
LNTL----- ---DIDKY-R WLTHIQPLWP QFWQENNEET QTVILQPLRG HQFORLFOKL
MEMQ----PE SRSDAELW-- -LLQLQPWP HSQAAATRNN CS--LSLLTR SRFRLYREL
NEEE-EEEA AEALSDAE-Q RLLQLQPWP N-PEDYLSDA GD--YEMLTH ASFRQLYREL
NERKPLSKSL KLKDAELW-- -LLQLQPWP VLPALLDD- ----FQPLNR TRFRQLYHAL

```

PKIPFPFKEY YWRELSELEE KIM----- -SYGSEDDGF DSGDL----- --VTRIPPFW  
PKMPFLFKEY YWHEMSELED KIM----- -SYGIKDDAS ARGDL----- --VTGIPSW  
PKVPFLFKEY YWHEMSKLED KIM----- -SYGIKDDAS ARGDL----- --VTGIPSW  
PKIPFPEKED FWYQVSQLLEA ELT----- -SIGSEKDEV PRDEL----- --VTWIPSW  
PKKRSADKDL FWYQVSTLED EIM----- -SFGREDDGL PSDDL----- --VTWTPSW  
PAAELEDKES FWRNVTVEE FLL----- -EHGEGEELA V----- --LKGPPAFW  
P-APEETPDE WMPKVKELEE AIT----- -AKVEKDALG WLPDPTTDNA GTLFPVPAYW  
P-APEETPDE WMPKVKELEE AIT----- -AKVEKDGLG WLPDPTTYNA GTLFPVPAYW  
H-LNLDNRTL -WRSIKHLEK QIT----- -QIQDDIGT ES----- --VISLPVNW  
QPLGVPEGKL -WQIQKLEK QLRLWLWLLH PSVLLDDASG VVDL----- -----TRW  
QPLGVAERRL -WKQLHRLEQ QLC----- -RCAQQEQE QE----- --QMRPLMLW  
QPLGVPOGKL -WLQVKLEK KLL----- -ICGIRELFG ELRESEHDEE HVMPSAFYW

MMPW--PNGN ITYE----- NLSQMAHMLD IKANEF---- -ILTYIYML KLVAEGVSTE  
MMPW--PNGN ITYE----- NLFEIAHFLD LKTDEF---- -IVVYIYML KLVPEGLSKE  
MMPW--PNGN ITYE----- NLFEIAHLLD LKTDEF---- -IVVYIYML KLVPEGLSKE  
MLPW--PNRY LTYR----- DLYSVARLLA LRTPOF---- -MLTYMYLRL KLLPEGLSKD  
MLPW--PHRN LTYR----- NLYQVAYLLK IQTPGF---- -MLTYIYLR LRVPEGRSRE  
MLPW--PARL PDLW----- HFKRMLMLT IHPAQF---- -LLRYIYLR SLIPDPASCQ  
MLPW--PTFE TGLS----- YVAHLSQYLA SQPPSLPPSL PAASFAAPRW RAGARGAS-P  
MMPW--PTFE TGLS----- YVTHLSQYLA SQPPRF---- -LLHYLLLR LH--RDGERA  
ILPLSRNFA PTEK----- YLQRLAHLN QQSSGL---- -LAPYLLRL QHRLEYSPEV  
LLPL--PATT ESVEYLG-ET YLRGVSLLLA AQPPSL---- -VARYLQRL LHQLELQVP  
LLPL--PAAS ARPSATRRPA YLSCVSALLA EQPVSL---- -LAAYLQRL LRLQLQAP  
LQLEMPPELL TTLQLOP--- HVRCASDMLA AEPAPF---- -VARYLQRL LHKLDILPAP

SMHIDRDQCA EQSRQILSHP AAWLVEKNH- P---RLKEEP VLQDIFAEK QRFQKLLAN  
SMHIDRDQCA EQSRQMLSHP AAWLVEKNH- P---RLKEEP VLQDIFEELK HRFQKLLAN  
SMHIDRDQCA EQSTQILSHP AAWLVETTP- P---RLKEEP VLQDIFEELK HRFQKLLAN  
SWLMDRDQCA EQSRQILSHP AAWLIEQNH- P---RLQEEP MLLDIFEELK QRFQKLRAN  
SWLIDRDECA EQSRQILSHP AAWLMEKNH- P---RLQEEP VLQDIFEELK QRFQKLRAN  
PWAIESNDCA LQARELLGHP VVWLMQEH- P---RLREDP VLQGLFGELK HRFQKLRAN  
AWS-----AL PRVGLFITHA AWWLVEAAP- P-----  
PWSFTRLECA AQGRIFITHA AWWLVEQH- P---RLQANG TLQSLFGELK QRFGLKLAN  
SPRFSRLPCS TQTRQFLTHA AWWLMASSE- N---FDSWDF LMQKLFDIK QEFRELIKN  
PLAFGRQCCA AQSRQLLTHA VVWLMQEAQL PQLQRQMRH SVQQLFAKLR RQFELKLLAN  
AF--GRQCCA AQSRQLLTHA AWWLLQQQV- PHAQRIHTND TMHQLFEQLR QQFKLQLQVN  
AF--GRQCCA AQSRQLLTHA AWWLLEQQQ- PLEQRQLTNA TMHQLFEQLR HRFELRLDN

RNNFTRSTQH FLLGKLKRM LRLSILPRNS SAQSMVRRIE RHYRDVHMNA SDYFGNLHIG  
RNNFTRSTQH FLLGKLKRM LRLSILPRNC TAQSMVRRIE RHYRDVHMNA SDYFGNLNIG  
RNNFTRSTQH FWSKK-KRM LRLSILPRNC SAQSMVRRIE RHYRDVHMNA SDYFGNLNIG  
RNNFTRRTQQ FLVRKLRM LRLSILPRNA SALNMGQLID GHYRHMNA SDYFGNLYIG  
RNNFTRRTQR HLMSKLRM LRLSILPRNS SAQYMRRID WHYRDVHMNA SDYFGNLYIG  
RNQFSARVQA FLLAKLDRML LRLSVLPORG ---DKVSAIA EHYQHRLRNA SDYFGNMLQL  
-----PPAA LLLKLERMS LRLSILPSTE AVESVEERVE QHYQLRINA TDYFGNLLAV  
RNKFSAAQR FLLEKLERMS LRLSILPSAE AVESVEERVE QHYQLRINA TDYFGNLLAV  
RNHFSKESQQ FLYDKLDRM LRLSVLPSGV RGSNLEQLL KYGDLTLN SDYFGNLLKL  
RNQFDAATQR FLLDKLRM LRVGVLPTG TANEHRLQLE THYAALQLNA SDYFGNLRAL  
RNRFDNATQS FLLQKLRM LRVGVLPSG SPEQQQQLE EHYAQLQLNA NDYFGNLLAL  
RNQFRPSTQR FLLEKLRM LRVGVLPSG SAEQQQQTLE AHYAALQLNA SDYFGNLLTM



RRRQCRLY  
RRRQCRLY  
RRRQCRLY  
RRRHCRLF  
RRRQCRLF  
KRRKPCRLY  
SRTRCQLY  
SRTRCQLY  
PSRKCKLY  
RRRICQLY  
KHPLCQLY  
IRNTCQLY
