# Supplementary material for: Evolutionary Rate Covariation Identifies New Members of a Protein Network Required for Drosophila melanogaster Female Post-Mating Responses
Source: PubMed Central journal article supplement (PMC3894160; doi:10.1371/journal.pgen.1004108), 2014-01-16
Supplement: pgen.1004108.s009.pdf [file pgen.1004108.s009.pdf]

**Table S1.** RNAi lines, drivers and crosses used in this study.

| <u>Gene</u>                         | <u>Sex</u> | <u>RNAi Line</u>               | <u>Driver</u> | <u>Crosses used to generate flies**</u>                   |
|-------------------------------------|------------|--------------------------------|---------------|-----------------------------------------------------------|
| CG34033                             | M          | homemade TRiP line             | tubulin-GAL4  | KD: RNAi x tubulin-GAL4<br>cont: y v 1509 x tubulin-GAL4  |
| CG11037                             | M          | VDRG-KK<br>transformant 108803 | ovulin-GAL4*  | KD: RNAi x ovulin-GAL4<br>cont: AttP x ovulin-GAL4        |
| CG11977                             | M          | VDRG-KK<br>transformant 100463 | ovulin-GAL4*  | KD: RNAi x ovulin-GAL4<br>cont: AttP x ovulin-GAL4        |
| CG14034                             | M          | VDRG-KK<br>transformant 100114 | tubulin-GAL4  | KD: RNAi x tubulin-GAL4<br>cont: RNAi x w1118             |
| <b>CG14061</b><br><b>(aquarius)</b> | M          | homemade TRiP line             | tubulin-GAL4  | KD: RNAi x tubulin-GAL4<br>cont: y v 1509 x tubulin-GAL4  |
| CG2975                              | M          | VDRG-GD<br>transformant 2601   | ovulin-GAL4   | KD: RNAi x ovulin-GAL4<br>cont: AttP x ovulin-GAL4        |
| <b>CG30488</b><br><b>(antares)</b>  | M          | VDRG-KK<br>transformant 100513 | tubulin-GAL4  | KD: RNAi x tubulin-GAL4<br>cont: AttP x tubulin-GAL4      |
| CG42326                             | M          | VDRG-KK<br>transformant 104709 | tubulin-GAL4  | KD: RNAi x tubulin-GAL4<br>cont: RNAi x w1118             |
| <b>CG12558</b><br><b>(intrepid)</b> | M          | VDRG-GD<br>transformant 14844  | tubulin-GAL4  | KD: RNAi x tubulin-GAL4<br>cont: TM3 siblings of KD cross |

|                                     |   |                                 |                           |                                                                                                                       |
|-------------------------------------|---|---------------------------------|---------------------------|-----------------------------------------------------------------------------------------------------------------------|
| CG13077                             | F | VDRRC-KK<br>transformant 105526 | tubulin-GAL4              | KD: RNAi x tubulin-GAL4<br>cont: AttP x tubulin-GAL4                                                                  |
| CG3097                              | F | homemade TRiP line              | tubulin-GAL4              | KD: RNAi x tubulin-GAL4<br>cont: y v 1509 x tubulin-GAL4                                                              |
| <b>CG3239</b><br><b>(fra mauro)</b> | F | TRiP line<br>Bloom stock 34558  | tubulin-GAL4              | KD: RNAi x tubulin-GAL4<br>cont: y v 1509 x tubulin-GAL4<br>(also attempted KD with Send1-GAL4, but saw no phenotype) |
| CG6910                              | F | VDRRC-KK<br>transformant 103766 | Send1-GAL4;<br>UAS-Dicer2 | KD: RNAi x Send1-GAL4; UAS-Dicer2<br>cont: AttP x Send1-GAL4; UAS-Dicer2                                              |
| CG42564                             | M | VDRRC-KK<br>transformant 101703 | ovulin-GAL4*              | KD: RNAi x ovulin-GAL4<br>cont: AttP x ovulin-GAL4                                                                    |
| CG8420                              | M | VDRRC-KK<br>transformant 104679 | ovulin-GAL4*              | KD: RNAi x ovulin-GAL4<br>cont: AttP x ovulin-GAL4                                                                    |
| <b>CG5630</b><br><b>(hadley)</b>    | F | VDRRC-GD<br>transformant 52066  | tubulin-GAL4              | KD: RNAi x tubulin-GAL4<br>cont: RNAi x w1118                                                                         |
| SPR<br>(control)                    | F | VDRRC-KK<br>transformant 106804 | tubulin-GAL4              | KD: RNAi x tubulin-GAL4<br>cont: RNAi x w1118                                                                         |
| CG30486                             | M | VDRRC-KK<br>transformant 107568 | tubulin-GAL4              | KD: RNAi x tubulin-GAL4<br>cont: AttP x tubulin-GAL4                                                                  |
| CG34295                             | M | VDRRC-KK<br>transformant 109546 | tubulin-GAL4              | KD: RNAi x tubulin-GAL4<br>cont: AttP x tubulin-GAL4                                                                  |
| sda                                 | F | VDRRC-KK<br>transformant 100215 | tubulin-GAL4              | KD: RNAi x tubulin-GAL4<br>cont: AttP x tubulin-GAL4                                                                  |

**Esp**                    F                    VDRC-GD                    tubulin-GAL4                    KD: RNAi x tubulin-GAL4  
**(CG7005)**                    transformant 9795                    cont: RNAi x w1118

\* knockdown with tubulin-GAL4 caused pre-adult lethality

\*\*We used four types of controls in our experiments:

-For most experiments with VDRC lines, we crossed the RNAi line and its genetic background control to the driver line.  
(The tubulin-GAL4 line had been backcrossed for 7 generations into a w1118 background that had itself  
been backcrossed for 8 generations.)

-For some experiments, we crossed the RNAi line to F7 tubulin-GAL4 (for KD flies) and to F8 w1118 (for controls).

-For crosses involving a TRiP RNAi line, we crossed the RNAi line and the y v 1509 genetic background control to the driver line.

-For crosses involving intrepid, controls were flies that carried the RNAi construct but received TM3, Sb instead of tubulin-GAL4

Additionally, crosses involving the following genes (VDRC stock number) did not produce detectable knockdown:

CG16713 (105067), CG4302 (100167), CG8586 (106597), Mtp (110414), vkg (106812)
