# Supplementary material for: Evolutionary Rate Covariation Identifies New Members of a Protein Network Required for Drosophila melanogaster Female Post-Mating Responses
Source: PubMed Central journal article supplement (PMC3894160; doi:10.1371/journal.pgen.1004108), 2014-01-16
Supplement: pgen.1004108.s010.pdf [file pgen.1004108.s010.pdf]

**Table S2.** Genomic locations of SP network proteins in *D. melanogaster*.

| <b>Gene</b> | <b><u>Chromosomal Location</u></b><br><b>[coding strand]</b> | <b><u>Functional Class</u></b> | <b><u>Clear Evidence of Tandem Duplication</u></b> |
|-------------|--------------------------------------------------------------|--------------------------------|----------------------------------------------------|
| CG1652      | 2R:5,700,867..5,704,105 [+]                                  | lectin                         | yes                                                |
| CG1656      | 2R:5,704,805..5,706,040 [+]                                  | lectin                         | yes                                                |
| CG17575     | 2R:8,733,049..8,734,101 [-]                                  | CRISP                          | no                                                 |
| antares     | 2R:8,734,353..8,735,509 [-]                                  | CRISP                          | no                                                 |
| SP          | 3L:13,294,735..13,295,022 [+]                                | peptide hormone                | n/a                                                |
| seminase    | 3L:20,948,855..20,949,850 [-]                                | protease homolog               | n/a                                                |
| hadley      | 3R:16,740,018..16,754,935 [+]                                | unknown                        | n/a                                                |
| Esp         | 3R:20,667,657..20,676,134 [+]                                | sulfate transporter            | n/a                                                |
| CG9997      | 3R:24,581,206..24,582,701 [-]                                | protease homolog               | no                                                 |
| aquarius    | 3R:24,582,721..24,583,956 [-]                                | protease homolog               | no                                                 |
| intrepid    | 3R:24,616,244..24,617,183 [+]                                | protease homolog               | no                                                 |
| SPR         | X:5,340,694..5,387,590 [+]                                   | GPCR                           | n/a                                                |
| fra mauro   | X:5,388,073..5,390,082 [-]                                   | neprilysin                     | n/a                                                |
