# Supplementary material for: Evolutionary Rate Covariation Identifies New Members of a Protein Network Required for Drosophila melanogaster Female Post-Mating Responses
Source: PubMed Central journal article supplement (PMC3894160; doi:10.1371/journal.pgen.1004108), 2014-01-16
Supplement: pgen.1004108.s011.pdf [file pgen.1004108.s011.pdf]

**Table S3. Measures of receptivity and fertility for additional RNAi lines for positive ERC candidate genes.**

| Gene                       | Replicate RNAi Line                                                                                                                     | 4-Day Receptivity                            | Day 4 Fertility (mean $\pm$ SE)                                 |
|----------------------------|-----------------------------------------------------------------------------------------------------------------------------------------|----------------------------------------------|-----------------------------------------------------------------|
| CG14061<br>( <i>aqrs</i> ) | none available                                                                                                                          | n/a                                          | n/a                                                             |
| CG30488<br>( <i>antr</i> ) | VDRC-GD transformant 41281<br>(control for siRNA sequence and insertion site)<br>control flies: UAS x F <sub>8</sub> w <sup>1118</sup>  | KD: 20/26<br>cont: 0/24<br><i>p</i> < 0.0001 | KD: 0.3 $\pm$ 0.3<br>cont: 29.5 $\pm$ 2.3<br><i>p</i> < 0.0001  |
| CG12558<br>( <i>intr</i> ) | none available                                                                                                                          | n/a                                          | n/a                                                             |
| CG3239<br>( <i>frma</i> )  | VDRC-KK transformant 102309<br>(control for siRNA sequence and insertion site)<br>control flies: AttP x F <sub>7</sub> <i>tub</i> -GAL4 | KD: 5/25<br>cont: 4/24<br><i>p</i> = 1.00    | KD: 29.9 $\pm$ 3.3<br>cont: 44.4 $\pm$ 3.8<br><i>p</i> < 0.007  |
| CG5630<br>( <i>hdly</i> )  | VDRC-GD transformant 52067<br>(control for UAS insertion site)<br>control flies: UAS x F <sub>8</sub> w <sup>1118</sup>                 | KD: 6/32<br>cont: 1/33<br><i>p</i> = 0.054   | KD: 20.8 $\pm$ 3.5<br>cont: 48.4 $\pm$ 3.0<br><i>p</i> < 0.0001 |
| <i>Esp</i>                 | VDRC-GD transformant 9797<br>(control for UAS insertion site)<br>control flies: UAS x F <sub>8</sub> w <sup>1118</sup>                  | KD: 13/29<br>cont: 3/18<br><i>p</i> = 0.0457 | KD: 22.4 $\pm$ 2.4<br>cont: 35.8 $\pm$ 2.7<br><i>p</i> < 0.0007 |

\*Knockdown of *frma* for line VDRC-KK 102309 was only partial, consistent with a less severe fertility phenotype. Other knockdown flies described above showed the following levels of knockdown: *antr* – near complete; *hdly* – near complete; *Esp* – complete.
